RESEARCH ARTICLE

# Influence of Ecological Factors on the Production of Active Substances in the Anti-Cancer Plant *Sinopodophyllum hexandrum* (Royle) T.S. Ying

Wei Liu, Jianjun Liu\*, Dongxue Yin, Xiaowen Zhao

College of Forestry, Northwest A & F University, Yangling, China

\* [ljj@nwsuaf.edu.cn](mailto:ljj@nwsuaf.edu.cn)

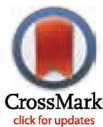

## Abstract

The quality of traditional Chinese herbal medicine, which plays a very important role in the health system of China, is determined by the active substances produced by the plants. The type, content, and proportion of these substances may vary depending on ecological factors in areas where the plants are grown. *Sinopodophyllum hexandrum* (Royle) T.S. Ying, an endangered plant species with great medical value, was investigated in eight production locations representative of its natural geographical distribution range in China. The correlation between the contents of the active ingredients extracted from the roots and rhizomes of *S. hexandrum* and the ecological factors were evaluated step-by-step using a series of computational biology methodologies. The results showed that ecological factors had significant effects on the contents but not on the types of the active ingredients in eight production locations. The primary ecological factors influencing the active substances included the annual average precipitation, July mean temperature, frost-free period, sunshine duration, soil pH, soil organic matter, and rapidly available potassium in the soil. The annual average precipitation was the most important determinant factor and was significantly and negatively correlated with the active ingredient contents ( $P < 0.001$ ). In contrast, organic matter was the most important limiting factor and was significantly and positively correlated with the active substances. These ecological factors caused 98.13% of the total geographical variation of the active ingredient contents. The climate factors contributed more to the active ingredient contents than did the soil factors. It was concluded that from the view of the contents of the secondary metabolites and ecological factors of each growing location, in Jingyuan, Ningxia Province, and Yongdeng, Gansu Province, conditions were favorable to the production of podophyllotoxin and lignans, whereas in Shangri-La, Yunnan Province, and Nyingchi, Tibet, conditions were favorable to the production of quercetin and kaempferol.

## OPEN ACCESS

**Citation:** Liu W, Liu J, Yin D, Zhao X (2015) Influence of Ecological Factors on the Production of Active Substances in the Anti-Cancer Plant *Sinopodophyllum hexandrum* (Royle) T.S. Ying. PLoS ONE 10(4): e0122981. doi:10.1371/journal.pone.0122981

**Received:** August 8, 2014

**Accepted:** February 26, 2015

**Published:** April 15, 2015

**Copyright:** © 2015 Liu et al. This is an open access article distributed under the terms of the [Creative Commons Attribution License](https://creativecommons.org/licenses/by/4.0/), which permits unrestricted use, distribution, and reproduction in any medium, provided the original author and source are credited.

**Data Availability Statement:** All relevant data are within the paper and its Supporting Information files.

**Funding:** This work was supported by the program from the Forestry Research Foundation for the Public Service Industry of China (Grant numbers: 200904004; <http://english.forestry.gov.cn/web/index.do>). The funders had no role in study design, data collection and analysis, decision to publish, or preparation of the manuscript.

**Competing Interests:** The authors have declared that no competing interests exist.

## Introduction

Plants have been used for centuries in traditional medicine and currently a quarter of all prescribed pharmaceuticals in industrialized countries contain compounds derived from plants, directly or indirectly via semi-synthesis [1]. Traditional Chinese herbal medicine (TCHM) has played important role in the Chinese medical system [2]. *Sinopodophyllum hexandrum* (Royle) T.S. Ying, family Berberidaceae, the only species of this genus in China, commonly known as Himalayan mayapple, is an important and rare TCHM native to the Himalayan regions [3]. The roots and rhizomes of *S. hexandrum* contain large amounts of lignans, three times the amount of lignans produced by the relative American species *Podophyllum peltatum* [4–6]. The most important lignan for human health is arguably the most active cytotoxic aryltetralin lignan, podophyllotoxin (PTOX), as a precursor for the semi-synthesis of the anticancer pharmaceuticals etoposide (VP-16), teniposide (VM-26), GP-7, and NK-611 [5,6,7–10]. These chemotherapeutic drugs have been used for cancer therapy, including the treatment of lung cancer, cervical cancer, testicular cancer, neuroblastoma, hepatoma, and certain leukemias [5,6,11,12]. In addition to its role in anti-cancer drugs, PTOX is the starting compound of a new derivative, CPH-82, which is included in clinical trials for the treatment of rheumatoid arthritis in Europe [13].

In addition to lignans, flavonoids such as quercetin and kaempferol have also been found in *Sinopodophyllum hexandrum* [14,15]. Studies have shown that flavonoids have multiple biological effects, including antioxidant [16], anti-inflammatory, antiviral, and platelet aggregation inhibition [17]. Some reports have suggested that flavonoid supplements could prevent cardiovascular diseases [16,18,19]. Due to their medicinal importance, wild *S. hexandrum* have been extensively harvested in the alpine Himalayan regions as the commercial source of PTOX and flavonoids. The extensive harvest of these plants added *S. hexandrum* to the endangered species list of the Convention on International Trade in Endangered Species of Wild Fauna and Flora [20,21]. *S. hexandrum* has been classified as an endangered species (grade 3) since 1987 and catalogued in the Chinese Plant Red Book [22].

Currently, with the enhanced awareness of its medicinal value and superior efficacy in clinical applications, the availability of PTOX from plants has become increasingly limited due to intense collection, habitat fragmentation, and the lack of organized cultivation in China. Wild *Sinopodophyllum hexandrum* populations could become extinct without rational exploitation measures, costing humans an ideal drug against cancer. Knowledge of the optimization of production locations is an important prerequisite for a rational exploitation program planning. However, previous studies have focused on the determination and separation of the phytochemicals [5,14,15,23–27], pharmacological functions [28–32], genetic diversity [33,34], micropropagation [35], and system evolution [36]. Studies on the optimization of production locations are limited despite the fact that ecological factors highly affect the secondary metabolite synthesis and their contents [37–39]. The metabolism and accumulation of active ingredients, most of which are secondary metabolites, is the reflection of integrated influences of multiple ecological factors on the medicinal plant during their developmental and growth periods in addition to genetic factors. Certain metabolites are only synthesized under specific environments, or their contents significantly increase under specific environments [40]. Furthermore, previous studies have demonstrated that medicinal plants grown in different environments produce different contents of secondary metabolites, resulting in differences in their medicinal qualities [37]. Traditionally, the qualities of TCHMs were assessed by their external appearance, and by the experiences of medicinal practice of ancient physicians. In this process, the concept of so called geo-authentic herbal drugs was established. Most geo-authentic traditional herbs produced in their native geographical area contain adequate effective

chemical constituents. For example, only *Neopicrorhiza scrophulariiflora* (Pennell) D.Y. Hong, one of the well-known herbal drugs in TCHM, produced in Tibet, China is officially recognized for use in medicinal practice [41]. By contrast, only *Panax ginseng* C.A. Mey., produced in northeastern China is officially recognized as medicinal drugs [41]. For *Glycyrrhiza uralensis* Fisch. ex DC. and *Astragalus membranaceus* Bunge, however, only those produced in Inner Mongolia Autonomous Region, China are officially recognized as medicinal resources [41].

The existing variations in podophyllotoxin contents among the *Sinopodophyllum hexandrum* populations were proved to be coupled with geographical altitude and local ecological conditions (temperature, rainfall, humidity, soil pH, etc.) but not with genetic basis in several studies [42,43]. Hence, we investigated the correlation between the main active ingredients including podophyllotoxin ( $Y_P$ ), 4'-demethylpodophyllotoxin ( $Y_{DP}$ ), 4'-demethylepipodophyllotoxin ( $Y_{DEP}$ ), total lignans ( $Y_{TL}$ ), quercetin ( $Y_Q$ ) and kaempferol ( $Y_K$ ) of *S. hexandrum* from representative production regions throughout China and ecological factors (soil and climate factors). The present study aims at clarifying the environmental factors affecting the production of active ingredients of *S. hexandrum* in different production locations where *S. hexandrum* has been naturally growth according to historical records in order to suggest the best production areas for this wild species, promote its reasonable exploitation for the production of medicinal drugs rather than extensively harvesting wild resources.

## Materials and Methods

### Ethics statement

The research activities were scientifically conducted under the permits issued by the local forestry departments. A detailed description of the material collection procedures was provided by the authors in [S1 Text](#). All locations where the plants were collected were not privately owned. The experimental procedures were approved by the Ethics Committee for Plant Experiments of Northwest A & F University (20120712004) and the State Forestry Administration, P. R. China. The names of the authorities that issued the permit for each location were listed in [S1 Table](#).

### Plant materials and soil samples

*Sinopodophyllum hexandrum* distribution pattern and extent of in China were investigated from 2010 to 2011. According to the field survey and species information in Flora of China [3], *S. hexandrum* have a natural distribution in seven provinces of China: Ningxia Province, Shaanxi Province, Qinghai Province, Gansu Province, Sichuan Province, Yunnan Province and Tibet. *S. hexandrum* roots and rhizomes were collected from eight representative production locations (Jingyuan in Ningxia Province, Mei county in Shaanxi Province, Huzhu in Qinghai Province, Yongdeng in Gansu Province, Kangding in Sichuan Province, Shangri-la in Yunnan Province, Nyingchi in Tibet and Diebu in Gansu Province) that encompassed all of its natural distribution areas involved in seven provinces of China ([Fig 1](#)) from July 19, 2012, to September 17, 2012, to ensure the consistency of the collection period. Four natural populations that were similar in growth statues (each population was separated geographically by at least 30 km) were selected at each test location. 20 healthy individuals of each natural population were collected. The distance between the adjacent individuals was at least 5 m to increase the likelihood of sampling inter-individual variations within each population [33,34]. A total of eighty individual samples were collected at each test location, as shown [Table 1](#). Root and rhizome samples were picked up respectively from four directions (north, south, east, and west) of three positions (up, middle and low part) of the hypogean part of each individual and then mixed as one individual sample. In each study site, eighty individual samples of four populations were

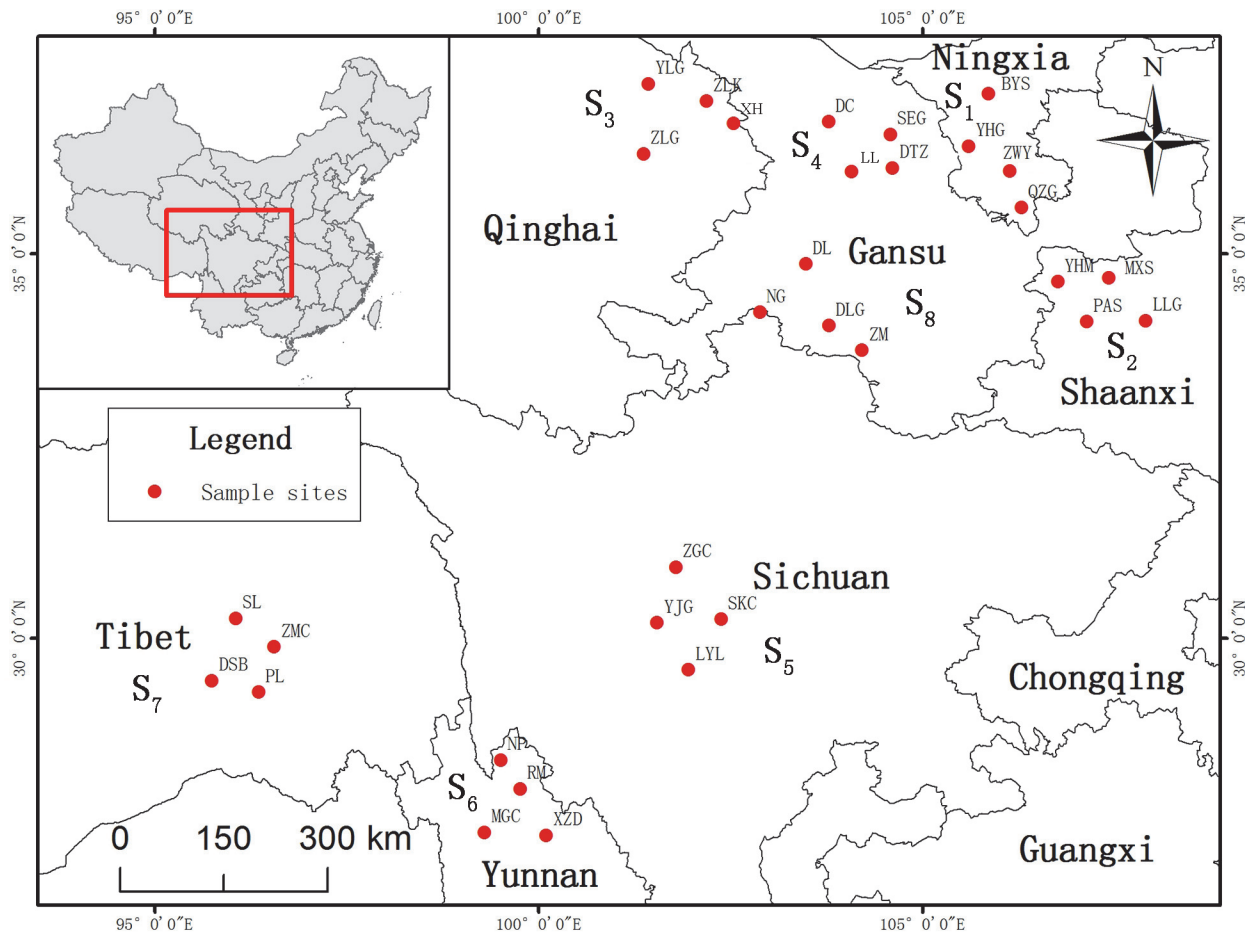

**Fig 1. Growing locations of the 32 *S. hexandrum* populations involved in seven provinces of China sampled for this study.** Maps generated using ArcGIS 10.0 (ESRI Inc. 2014).

doi:10.1371/journal.pone.0122981.g001

evenly mixed as a test sample [37]. Eight test samples obtained from eight study sites were dried under the vacuum at 40°C, and ground into powders, by which the contents of the active ingredients were measured. Simultaneously, soil rhizosphere were collected and treated for each study site, thereby obtained eight soil samples from eight study sites for the measurement of soil factors. Voucher specimens from all populations were identified by professor Jianjun Liu of Northwest A&F University and were deposited at the Herbarium of Northwest A&F University (WUK0780759-0780790).

### Related data of ecological factors

Soil samples were used to determine the key soil factors (soil parameters) including rapidly available nitrogen ( $X_{RAN}$ ), rapidly available phosphorus ( $X_{RAP}$ ), rapidly available potassium ( $X_{RAPM}$ ), total nitrogen ( $X_{TN}$ ), total phosphorus ( $X_{TP}$ ), total potassium ( $X_{TPM}$ ), organic matter ( $X_{OM}$ ) and pH ( $X_{pH}$ ) using the modified soil chemistry analysis methods described by Sparks *et al.* [44]. Related data of climate factors including january average temperature ( $X_{JAT}$ ), july mean temperature ( $X_{JMT}$ ), annual accumulated temperature ( $\geq 10^{\circ}$ ) ( $X_{ALT}$ ), annual mean temperature ( $X_{AMT}$ ), annual average precipitation ( $X_{AAP}$ ), annual sunshine duration ( $X_{ASD}$ ), frost free period ( $X_{FFP}$ ) and relative humidity ( $X_{RH}$ ) in the recent 50 years (1963 ~ 2012) were also

**Table 1. Sample information of the 8 sampling sites in seven provinces of China.**

| No.            | Locations           | Population    | Code | Coordinates     | N  | Altitude (m) | Soil type            | Climate zones                                         |
|----------------|---------------------|---------------|------|-----------------|----|--------------|----------------------|-------------------------------------------------------|
| S <sub>1</sub> | Jingyuan, Ningxia   | Baiyunshan    | BYS  | E106°15'N35°37' | 20 | 2232         | Gray cinnamonic soil | Humid and semi-humid temperate climate zone           |
|                |                     | Yehegu        | YHG  | E106°13'N35°31' | 20 | 2370         | Gray cinnamonic soil | Humid and semi-humid temperate climate zone           |
|                |                     | Zhiwuyuan     | ZWY  | E106°18'N35°22' | 20 | 2080         | Gray cinnamonic soil | Humid and semi-humid temperate climate zone           |
|                |                     | Qiaozigou     | QZG  | E106°22'N35°15' | 20 | 2564         | Gray cinnamonic soil | Humid and semi-humid temperate climate zone           |
| S <sub>2</sub> | Mei county, Shaanxi | Pingansi      | PAS  | E107°43'N34°1'  | 20 | 2815         | Dark brown soil      | Semi-humid warm temperate continental monsoon climate |
|                |                     | Mingxingsi    | MXS  | E107°44'N34°0'  | 20 | 2637         | Dark brown soil      | Semi-humid warm temperate continental monsoon climate |
|                |                     | Yuhuangmiao   | YHM  | E107°22'N34°5'  | 20 | 1780         | Dark brown soil      | Semi-humid warm temperate continental monsoon climate |
|                |                     | Liulingou     | LLG  | E108°10'N33°52' | 20 | 1013         | Dark brown soil      | Semi-humid warm temperate continental monsoon climate |
| S <sub>3</sub> | Huzhu, Qinghai      | Zhalongkou    | ZLK  | E102°34'N36°53' | 20 | 2264         | Alpine meadow soil   | Semi-arid continental plateau monsoon climate zone    |
|                |                     | Zhalonggou    | ZLG  | E102°37'N36°47' | 20 | 2698         | Alpine meadow soil   | Semi-arid continental plateau monsoon climate zone    |
|                |                     | Yuanlongogu   | YLG  | E102°27'N36°54' | 20 | 3069         | Alpine meadow soil   | Semi-arid continental plateau monsoon climate zone    |
|                |                     | Xiahe         | XH   | E102°42'N36°44' | 20 | 3169         | Alpine meadow soil   | Semi-arid continental plateau monsoon climate zone    |
| S <sub>4</sub> | Yongdeng, Gansu     | Suoergou      | SEG  | E102°43'N36°40' | 20 | 2389         | Alpine meadow soil   | Semi-arid continental cold temperate climate zone     |
|                |                     | Lalagou       | LL   | E102°43'N36°35' | 20 | 2733         | Alpine meadow soil   | Semi-arid continental cold temperate climate zone     |
|                |                     | Dachang       | DC   | E102°44'N36°44' | 20 | 2449         | Alpine meadow soil   | Semi-arid continental cold temperate climate zone     |
|                |                     | Datanzigou    | DTZ  | E102°46'N36°33' | 20 | 2530         | Alpine meadow soil   | Semi-arid continental cold temperate climate zone     |
| S <sub>5</sub> | Kangding, Sichuan   | Yajai geng    | YJG  | E101°57'N30°0'  | 20 | 2946         | Rich in humus loam   | Humid subtemperate plateau climate zone               |
|                |                     | Laoyulin      | LYL  | E101°59'N29°55' | 20 | 3788         | Rich in humus loam   | Humid subtemperate plateau climate zone               |
|                |                     | Shengkangcun  | SKC  | E102°1'N30°4'   | 20 | 3207         | Rich in humus loam   | Humid subtemperate plateau climate zone               |
|                |                     | Zhonggucun    | ZGC  | E101°54'N30°16' | 20 | 3554         | Rich in humus loam   | Humid subtemperate plateau climate zone               |
| S <sub>6</sub> | Shangri-la, Yunnan  | Rime          | RM   | E99°37'N27°51'  | 20 | 3528         | Subalpine shrub soil | Mountains cool temperate monsoon climate zone         |
|                |                     | Naipi         | NP   | E99°36'N28°2'   | 20 | 3432         | Subalpine shrub soil | Mountains cool temperate monsoon climate zone         |
|                |                     | Xiaozhongdian | XZD  | E99°56'N27°28'  | 20 | 3590         | Subalpine shrub soil | Mountains cool temperate monsoon climate zone         |
|                |                     | Mugaocun      | MGC  | E99°34'N27°30'  | 20 | 2250         | Subalpine shrub soil | Mountains cool temperate monsoon climate zone         |
| S <sub>7</sub> | Nyingchi, Tibet     | Zhangmaicun   | ZMC  | E94°20'N29°40'  | 20 | 3097         | Subalpine shrub soil | Temperate continental plateau climate zone            |
|                |                     | Selong        | SL   | E94°11'N29°44'  | 20 | 3173         | Subalpine shrub soil | Temperate continental plateau climate zone            |

(Continued)



Table 1. (Continued)

| No.            | Locations    | Population | Code | Coordinates     | N  | Altitude (m) | Soil type            | Climate zones                              |
|----------------|--------------|------------|------|-----------------|----|--------------|----------------------|--------------------------------------------|
|                |              | Pula       | PL   | E94°22'N29°27'  | 20 | 3256         | Subalpine shrub soil | Temperate continental plateau climate zone |
|                |              | Duosongba  | DSB  | E94°13'N29°37'  | 20 | 3855         | Subalpine shrub soil | Temperate continental plateau climate zone |
| S <sub>8</sub> | Diebu, Gansu | Zemo       | ZM   | E103°21'N33°45' | 20 | 2728         | Alpine meadow soil   | Mountain continental climate zone          |
|                |              | Dalong     | DL   | E103°14'N35°2'  | 20 | 2620         | Alpine meadow soil   | Mountain continental climate zone          |
|                |              | Dalagou    | DLG  | E103°22'N33°52' | 20 | 2677         | Alpine meadow soil   | Mountain continental climate zone          |
|                |              | Nagai      | NG   | E103°14'N33°51' | 20 | 2963         | Alpine meadow soil   | Mountain continental climate zone          |

Note: N means sample size.

doi:10.1371/journal.pone.0122981.t001

collected from local meteorological bureaus (stations) for the eight study sites. The names of meteorological bureaus (stations) for each location were provided in [S2 Table](#).

The soil factors and climate factors of the eight study sites were summarized in [Table 2](#).

### Sample preparation

First, 5.0 g of pulverized roots and rhizomes of *Sinopodophyllum hexandrum* was extracted by refluxing three times (2 h each time) at 80°C with 125 mL of ethanol. The extraction solutions were combined and then subjected to ultrasonic vibration for 30 min. After cooling to room temperature, the obtained solutions were filtered, concentrated into red brown extracts by evaporation, reflux-extracted twice (2 h each) with benzene, and then filtered. The filtered liquor was concentrated for crystallization, yielding 125 mg of light-yellow crystals. Subsequently, the crystalline substances were dissolved, and diluted with methanol to produce a stock solution (1 mg/mL). 2 mL of the stock solution was filtered through a 0.22 µm membrane filter, and an aliquot of each filtrate (10 µL) was directly injected into the liquid chromatography (LC) instrument for analysis.

### Chromatographic analysis by reverse phase-high performance liquid chromatography (RP-HPLC)

An LC system consisting of a vacuum degasser, quaternary pump, and variable wavelength detector (VWD) detector (Agilent Co., USA) was used to acquire the chromatograms and UV spectra [15]. Chromatographic separation was achieved using a C18 column (250×4.6 mm, 5 µm; Diamonsil, USA), and a gradient solvent system comprised of 0.1% formic acid-water (solvent A) and acetonitrile (solvent B). The gradient profile was as follows: 0 min–25 min, linear 10%–35% of B; 25 min–55 min, linear 35%–65% of B; 55 min–85 min, linear 65%–75% of B; 85 min–100 min, linear 75%–100% of B, 100 min–110 min, equicontinuous 100% of B. A flow rate of 0.8 mL/min was used. UV detection was carried out at 290 nm. After 110 min, no peaks were found; chromatograms within 110 min were studied. The standard solutions including PTOX, 4-demethylpodophyllotoxin, 4-demethylepipodophyllotoxin, quercetin, and kaempferol were used for the calibration of a standard curve using an external standard method. The analyses were performed in triplicate.

**Table 2. Main ecological factors of eight locations throughout China.**

| Itemss            | S <sub>1</sub>   | S <sub>2</sub>    | S <sub>3</sub>  | S <sub>4</sub>   | S <sub>5</sub>    | S <sub>6</sub>   | S <sub>7</sub>    | S <sub>8</sub>   |
|-------------------|------------------|-------------------|-----------------|------------------|-------------------|------------------|-------------------|------------------|
| X <sub>RAN</sub>  | 6.31±0.03 abcd   | 28.12±0.02 cde    | 32.65±0.04 abc  | 8.09±0.07 ab     | 7.43±0.04 abc     | 8.13±0.03 abcd   | 32.21±0.02 cde    | 35.82±0.03 abc   |
| X <sub>RAP</sub>  | 6.42±0.06 ab     | 7.58±0.05 a       | 8.56±0.02 b     | 11.37±0.15 de    | 8.25±0.24 ab      | 7.24±0.06 ab     | 8.85±0.05 a       | 10.13±0.02 b     |
| X <sub>RAPM</sub> | 107.69±0.02 cde  | 357.53±0.04 e     | 96.71±2.14 de   | 132.04±4.30 e    | 160.41±0.01 de    | 135.96±0.02 cde  | 384.35±0.03 e     | 112.71±0.04 de   |
| X <sub>TN</sub>   | 0.23±0.02 e      | 0.25±0.001 bc     | 0.20±0.004 e    | 0.29±0.005 de    | 0.32±0.004 e      | 0.17±0.001 e     | 0.33±0.001 bc     | 0.16±0.005 e     |
| X <sub>TP</sub>   | 0.03±0.001 ab    | 0.11±0.002 cde    | 0.14±0.003 e    | 0.21±0.005 bc    | 0.05±0.001 de     | 0.02±0.001 ab    | 0.15±0.002 cde    | 0.32±0.003 e     |
| X <sub>TPM</sub>  | 2.45±0.01 e      | 1.49±0.02 de      | 1.62±0.04 de    | 1.77±0.03 abc    | 2.46±0.05 e       | 2.60±0.01 e      | 1.56±0.02 de      | 2.35±0.04 de     |
| X <sub>OM</sub>   | 5.00±0.01 bcde   | 6.52±0.01 bcd     | 5.40±0.01 b     | 10.02±0.06 de    | 6.38±0.03 cde     | 4.09±0.01 bcde   | 7.22±0.03 bcd     | 6.50±0.01 b      |
| X <sub>pH</sub>   | 6.20±0.05 abc    | 7.31±0.03 bcd     | 6.59±0.05 cde   | 6.39±0.07 cde    | 6.12±0.06 abcd    | 6.40±0.05 abc    | 7.09±0.03 bcd     | 6.20±0.05 cde    |
| X <sub>JAT</sub>  | -7.0±0.01 bcd    | -4.0±0.04 abcd    | -8.2±0.02 de    | -7.6±0.05 bcd    | -2.2±0.04 bcd     | -5.6±0.01 bcd    | 1.5±0.03 abcd     | -5.0±0.02 de     |
| X <sub>JMT</sub>  | 19.0±0.01 abc    | 22.5±0.07 ab      | 23.4±0.03 bcd   | 21.7±0.04 d      | 15.5±0.01 ab      | 13.4±0.02 abc    | 16.3±0.03 ab      | 16.8±0.05 bc     |
| X <sub>AAT</sub>  | 1847.43±0.03 bc  | 2390.80±0.05 ab   | 3643.87±0.06 c  | 4108.22 ±0.04bcd | 1265.20 ±0.04bcde | 1526.70±0.03 bc  | 2263.20±0.05 ab   | 1931.52±0.03 bcd |
| X <sub>AHT</sub>  | 40.44±0.08 cd    | 32.80±0.04 bc     | 39.50±0.01 abc  | 35.00±0.03 ab    | 31.70±0.01 cd     | 24.60±0.04 cd    | 30.60±0.05 bc     | 33.90±0.02 abc   |
| X <sub>ALT</sub>  | -24.00±0.04 de   | -25.50±0.06 d     | -26.62±0.03 bcd | -24.24±0.01 bc   | -28.91±0.04 abc   | -23.40±0.04 de   | -14.4±0.02 d      | -20.30±0.03bcd   |
| X <sub>AMT</sub>  | 6.90±0.05 ab     | 7.60±0.08 d       | 4.32±0.04 e     | 6.40±0.02 e      | 7.00±0.05 cde     | 5.50±0.05 ab     | 9.00±0.08 d       | 6.80±0.04 e      |
| X <sub>AAP</sub>  | 616.32±0.01 abc  | 635.44±0.04 bc    | 620.30 ±0.04abc | 310.27±0.06 cde  | 880.30±0.04 ab    | 627.20±0.01 abc  | 650.45±0.04 bc    | 642.41 ±0.06abc  |
| X <sub>ASD</sub>  | 2370.12±0.04 ab  | 2021.35 ±0.07bcde | 1226.55 ±0.03bc | 2659.62 ±0.06abc | 1738.34±0.03 a    | 2206.40±0.04 ab  | 2020.53 ±0.07bcde | 2246.20 ±0.01bc  |
| X <sub>FFP</sub>  | 132.61 ±15.38abc | 158.00±9.66 a     | 230.54 ±11.55ab | 121.52±8.12 abc  | 180.00±1.23 a     | 167.00 ±15.38abc | 180.00±9.66 a     | 147.35 ±11.55ab  |
| X <sub>RH</sub>   | 63±0.02 ab       | 70±0.04 a         | 74±0.05 c       | 55±0.02 bc       | 68±0.01 ac        | 45±0.02 a        | 55±0.03 ab        | 65±0.04 b        |

**Note:** For soil factors and climate factors, values were given as mean ± SD. For each location, values followed by the same small letter did not share significant differences according to Duncan's test ( $P < 0.05$ ). X<sub>RAN</sub>(mg/kg)-Rapidly available nitrogen, X<sub>RAP</sub>(mg/kg)-Rapidly available phosphorus, X<sub>RAPM</sub>(mg/kg)-Rapidly available potassium, X<sub>TN</sub>(%)-Total nitrogen, X<sub>TP</sub>(%)-Total phosphorus, X<sub>TPM</sub>(%)-Total potassium, X<sub>OM</sub>(%)-Organic matter, X<sub>pH</sub>-pH, X<sub>JAT</sub>(°C)-January average temperature, X<sub>JMT</sub>(°C)-July mean temperature, X<sub>AAT</sub>(°C)-Annual accumulated temperature(≥10°C), X<sub>AHT</sub>(°C)-Annual highest temperature, X<sub>ALT</sub>(°C)-Annual lowest temperature, X<sub>AMT</sub>(°C)-Annual mean temperature, X<sub>AAP</sub>(mm)-Annual average precipitation, X<sub>ASD</sub>(h)-Annual sunshine duration, X<sub>FFP</sub>(d)-Frost free period, X<sub>RH</sub>(%)-Relative humidity.

doi:10.1371/journal.pone.0122981.t002

The cosine values of the vectorial angle of the entire chromatographic patterns among the samples were calculated and the simulative mean chromatogram was calculated using the Computer Aided Similarity Evaluation System (CASES) software for the chromatographic fingerprinting of TCHM. This software was employed to synchronize the chromatographic peaks, to calculate the cosine values of the vectorial angle among different chromatograms, as well as to compute the mean chromatogram as a representative standard chromatogram for a group of chromatograms. The cosine values of the two chromatograms approaching 1 indicates that they are highly similar. The standard LC fingerprint was set up with the median of all chromatograms [45–47]. The similarities of the entire chromatographic profiles were analyzed among the tested samples. The contents of PTOX, 4-demethylpodophyllotoxin, 4-demethyl-pipodophyllotoxin, quercetin, and kaempferol were respectively obtained according to the relative retention time and relative peak area of reference chromatographs of the standards with the help of the standard curve equation.

## Measurement of total lignans

A modified UV spectrophotometry method (reference wavelength method) was used to determine the total lignan contents [48]. 4 mL of the diluted solution (1 mg/mL) prepared as described in the “Sample preparation” subsection was pipetted and then transferred to a 10 mL volumetric flask and made up to the mark with methanol. The absorbance at 290 nm and 392 nm was measured against a blank (100% of methanol), respectively. Standard PTOX (5.25–95.40 mg/L) and kaempferol (5–60 mg/L) products were used for the standard curve calibration. All measurements were repeated in triplicate.

## Data analyses

The results were presented as the mean value  $\pm$  standard deviation (SD). The data were analyzed by one-way ANOVA followed by Duncan multiple comparison based on the SPSS 19.0 software. Values of  $P < 0.05$  were considered statistically significant. Chromatographic analysis of eight plant samples (S<sub>1</sub>–S<sub>8</sub>, Table 1) from eight study sites was conducted by CASES, a chemometrics computer software for the chromatographic fingerprinting of TCHM developed by the Institute of Pharmacy Engineering (Zhejiang University, Hangzhou, China) and endorsed by the National Pharmacopoeia Committee of the People’s Republic of China for similarity studies of the chromatographic fingerprints of Chinese herbs.

Prior to the analysis, spatial autocorrelation (given as global Moran’s I) were examined across realisations using the software Geoda 1.0.0 (<http://geodacenter.asu.edu/software/downloads>) [49], no spatial autocorrelation existed in present study region (global Moran’s I values =  $0.000 \pm 0.000$ ,  $P > 0.1$ ). Five methodologies were performed step-by-step to analysis systematically the influence of ecological factors on the active ingredient contents of roots and rhizomes of *Sinopodophyllum hexandrum*, which also represented a quantitative comparative analysis of the dynamic process of plant and the environment. Correlation analysis (CA) and principal component analysis (PCA) were carried out using SPSS 19.0 software. CA attempted to test whether a correlation between active ingredients and the ecological factors or not to provide a basis for subsequent statistical analysis. PCA has recently become the tool of choice for monitoring complex chemical processes [50–53]. PCA has the strong advantage of significantly reducing the dimension of the complex components of plants while preserving most of the variance within by using dependencies among large numbers of variables without requiring knowledge of the data set in order to visualize high dimensional data and identify the most important variables [54]. PCA in the present study was used to find out principal components of active ingredients. Gray correlation analysis (GCA), a system analysis technique, is usually applied in indefinite gray systems, including those with small sampling and poor data information, in which limited information is available, others are not known [37,55,56]. Path analysis (PA) deals with the quantitative relationship between dependent and independent variables to explain the relative significance of each factor to the dependent variables [37,57]. GCA and PA were conducted by DPS 2006 software to select the primary ecological factors and evaluate correlations between the active ingredients and these primary ecological factors, respectively. The correlation coefficient in PA contains the direct path coefficient and the indirect path coefficient. However, a large direct effect between independent variables and dependent variables does not always imply a strong correlation between them. Therefore, PA could not identify which independent variable has the decisive effect on the dependent variable. Thus, further analysis using the decisive coefficient (analysis of decisive degree (ADD)) should be conducted to reflect the comprehensive decisive effect of independent variables on dependent variables by other independent variables and determine the determinant factors [58]. Ecological factors



were used as independent variables and active ingredients were used as dependent variables in the each test.

## Results

### Validation of the HPLC procedure

Method reproducibility and repeatability of the method were evaluated by analyzing six injections of the same sample solution and six replicates of sample extraction, respectively. Precision of retention times and peak areas of the five compounds 4'-Demethylpodophyllotoxin (peak 7), 4'-Demethylepipodophyllotoxin (peak 8), podophyllotoxin (peak 10), kaempferol (peak 14), quercetin (peak 15) (Fig 2) for replicated injection were in the range of 0.16–1.4% and 1.3–3.1% of relative standard deviation (RSD) (n = 6), respectively. The RSD of peak area of the five compounds in sample replicates were about 2.3–4.1% (n = 6). To confirm the accuracy of the method, a recovery experiment was performed by mixing quantified samples with specific quantities of standard compounds. The average percentages of recovery of the five compounds ranged from 98.25±5.27% to 103.61±3.12%. In addition, the RSD varied from 2.73% to 5.38% (n = 6). The limit of detection (LOD) (signal/noise = 3) and the limit of quantification (LOQ) (signal/noise = 10) of the five compounds varied within the range 1.93–3.07 ng/mL and 7.86–10.23 ng/mL. The stability of the five compounds in the sample solution was evaluated by determining their RPA after storage for 0–24 h, respectively. The RSDs of the retention times and peak areas were both less than 3%. All the results demonstrated that the conditions for the fingerprint analysis were repeatable and accurate (Table 3).

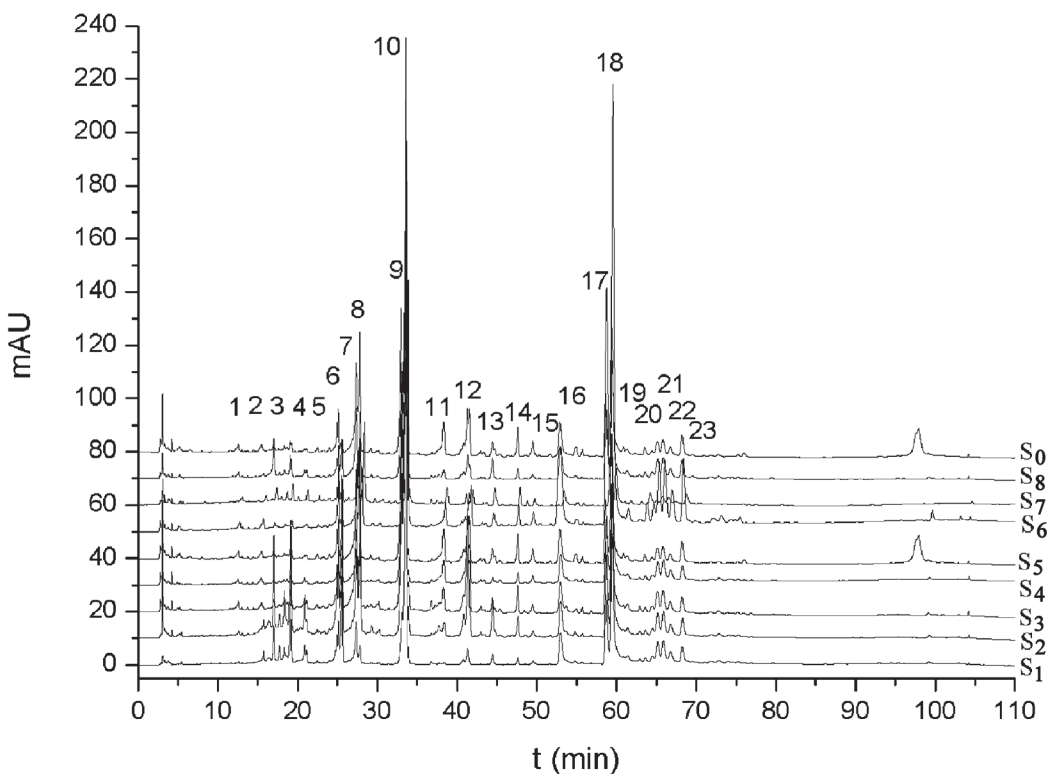

**Fig 2. Chromatography of all the samples from eight different production locations (S<sub>1</sub>–S<sub>8</sub>).** S<sub>1</sub>: Jingyuan, Ningxia; S<sub>2</sub>: Mei county, Shaanxi; S<sub>3</sub>: Huzhu, Qinghai; S<sub>4</sub>: Yongdeng, Gansu; S<sub>5</sub>: Kangding, Sichuan; S<sub>6</sub>: Shangri-la, Yunnan; S<sub>7</sub>: Nyingchi, Tibet; S<sub>8</sub>: Diebu, Gansu.

doi:10.1371/journal.pone.0122981.g002

**Table 3. Validation test for the quantitative determination of the five compounds (n = 6).**

| Peak No. | Compound                      | Linearity range (µg/mL) | Calibration curve        | Correlation coefficient | LOD (ng/mL) | LOQ(ng/mL) | Recovery experiment  |         |
|----------|-------------------------------|-------------------------|--------------------------|-------------------------|-------------|------------|----------------------|---------|
|          |                               |                         |                          |                         |             |            | Average recovery (%) | RSD (%) |
| 10       | Podophyllotoxin               | 1–100                   | Y = 0.031207X + 0.038612 | 0.9994                  | 2.41        | 8.04       | 102.42±2.83          | 2.78    |
| 7        | 4'-Demethylpodophyllotoxin    | 1–100                   | Y = 0.024322X + 0.044303 | 0.9991                  | 1.93        | 7.86       | 103.61±3.12          | 3.16    |
| 8        | 4'-Demethylepipodophyllotoxin | 1–100                   | Y = 0.039216X + 0.065137 | 0.9995                  | 2.15        | 8.01       | 101.23±2.69          | 2.73    |
| 15       | Quercetin                     | 0.5–50                  | Y = 0.012137X + 0.006341 | 0.9996                  | 2.92        | 9.88       | 98.25 ± 5.27         | 5.33    |
| 14       | Kaempferol                    | 0.5–50                  | Y = 0.021675X + 0.018776 | 0.9993                  | 3.07        | 10.23      | 98.68 ± 5.34         | 5.38    |

**Note:** LOD—Limit of Detection, LOQ—Limit of quantitation, RSD—Relative standard deviation.

doi:10.1371/journal.pone.0122981.t003

### Establishment and evaluation of the fingerprint of *Sinopodophyllum hexandrum* grown in different locations

The HPLC fingerprints of the eight production locations were established (Fig 2). Fig 2 shows that the relative retention time of every common peak in each of the HPLC fingerprints was consistent with that of the others, although the relative peak area differed significantly. The similarity of the LC fingerprint of each production location to the standard LC fingerprint  $S_0$  was evaluated by selecting different numbers of common peaks (5, 10, 15, 23) (Table 4). The evaluation results showed the lowest similarity (0.859–0.900) for *Sinopodophyllum hexandrum* from the Shangri-la, Yunnan, whereas the chemical fingerprints from other production locations had high similarity (above 0.900), indicating that the types of chemical ingredients contained in *S. hexandrum* roots and rhizomes were similar or the same among the eight production locations, but their contents exhibited significant differences.

**Table 4. Similarity of chromatography of eight samples from eight locations.**

| Number of communal peaks | The similarities of eight samples |       |       |       |       |       |       |       |       |
|--------------------------|-----------------------------------|-------|-------|-------|-------|-------|-------|-------|-------|
|                          | $S_1$                             | $S_2$ | $S_3$ | $S_4$ | $S_5$ | $S_6$ | $S_7$ | $S_8$ | $S_0$ |
| 5                        | 0.944                             | 0.912 | 0.924 | 0.946 | 0.933 | 0.859 | 0.919 | 0.963 | 1.000 |
| 10                       | 0.971                             | 0.966 | 0.963 | 0.955 | 0.947 | 0.868 | 0.982 | 0.956 | 1.000 |
| 15                       | 0.975                             | 0.968 | 0.964 | 0.954 | 0.947 | 0.869 | 0.983 | 0.957 | 1.000 |
| 23                       | 0.982                             | 0.970 | 0.966 | 0.952 | 0.953 | 0.900 | 0.986 | 0.961 | 1.000 |

**Note:** The cosine values of vectorial angle of the entire chromatographic patterns among different samples were calculated and the simulative standard chromatogram ( $S_0$ ) was set up with the median of all chromatograms using the Computer Aided Similarity Evaluation System for Chromatographic Fingerprint of Traditional Chinese Herbal Medicine (CASES), a chemometrics computer software endorsed by the National Pharmacopoeia Committee of the People’s Republic of China for similarity studies of chromatographic fingerprints of Chinese herbs. The cosine values of the two chromatograms (similarity) approaching 1 means they are highly similar.

doi:10.1371/journal.pone.0122981.t004

### Differences in active ingredients in the roots and rhizomes of *Sinopodophyllum hexandrum* growing in different locations

Significant differences were observed in the contents of the active ingredients of the roots and rhizomes of *Sinopodophyllum hexandrum* from different production locations (Fig 3). The highest PTOX contents were observed in the roots and rhizomes of *S. hexandrum* collected from Jingyuan, Ningxia (6.71%), which was five times higher than that in Shangri-la, Yunnan (the lowest level, 1.44%). The total lignan contents were the highest (17.46%) in Yongdeng, Gansu, followed by Huzhu, Qinghai (15.94%), whereas the lowest level was observed in samples from Kangding, Sichuan (9.31%), which was not consistent with the PTOX content ordering. This finding is reasonable because total lignans is a general term for a large group of substances that consists of many chemical ingredients, and the total lignan contents are determined by the contents of PTOX as well as other related ingredients. The 4'-demethylpodophyllotoxin and 4'-demethyl-epipodophyllotoxin contents were the highest in Mei county, Shaanxi (4.40%), and Huzhu, Qinghai (6.38%), respectively, and the lowest in Kangding, Sichuan (1.85%, 2.10%). The quercetin and kaempferol contents were low in all locations, but their content differences among the different production locations were obvious. The quercetin contents were the highest (0.0824%) in Nyingshi, Tibet, being 40 times higher than the lowest level, which was found in Jingyuan, Ningxia (0.0022%). The highest kaempferol contents (0.067%) were observed in Mei county, Shaanxi, being 61 times higher than the lowest level, which was found in Yongdeng, Gansu (0.0011%).

Although the content of each active ingredient from the roots and rhizomes of *Sinopodophyllum hexandrum* had significant differences, the orders of the contents of these substances were quite similar in each production location. Total lignan ranked the first, PTOX, 4'-demethylpodophyllotoxin and 4'-demethylepipodophyllotoxin ranked the second, and quercetin and kaempferol ranked the last place. The consistency of this ordering across eight test

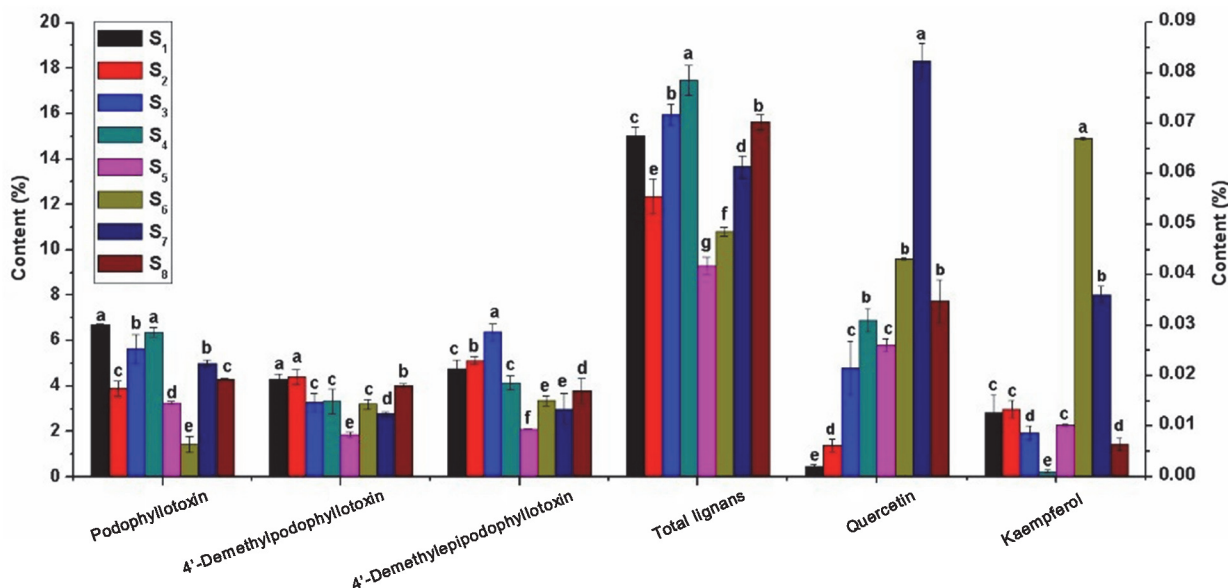

**Fig 3. Differences in the contents of podophyllotoxin, 4'-Demethylpodophyllotoxin, 4'-Demethylepipodophyllotoxin, total lignans (see the left ordinate), quercetin and kaempferol (see the right ordinate) in the roots and rhizomes of *S. hexandrum* growing in different production locations.** S<sub>1</sub>: Jingyuan, Ningxia; S<sub>2</sub>: Mei county, Shaanxi; S<sub>3</sub>: Huzhu, Qinghai; S<sub>4</sub>: Yongdeng, Gansu; S<sub>5</sub>: Kangding, Sichuan; S<sub>6</sub>: Shangri-la, Yunnan; S<sub>7</sub>: Nyingshi, Tibet; S<sub>8</sub>: Diebu, Gansu.

doi:10.1371/journal.pone.0122981.g003

locations indicated the germplasm resources stability of *S. hexandrum* populations selected, potentially relating to the genetic characteristics of *S. hexandrum*.

## Analysis of ecological factors influencing the active ingredients of *Sinopodophyllum hexandrum*

**Correlation analysis.** The synthesis and accumulation (secondary metabolism) of the active ingredients of medicinal plants is an extremely complex process affected by a series of ecological factors, comprising a multivariable system. Soil factors were significantly different owing to different production locations and climate factors changed with geographical conditions of different study sites, which caused the differences in terms of growth environment of *Sinopodophyllum hexandrum* (Table 2). CA showed that the active ingredient contents were correlated to all of the ecological factors studied but at different levels (Table 5). PTOX was significantly and positively correlated to the  $X_{JMT}$  ( $R = 0.972$ ), indicating that the temperature during the growth period of *S. hexandrum* had a strong effect on PTOX synthesis, followed by  $X_{PH}$  ( $R = -0.963$ ).  $X_{OM}$  exhibited a highly significant and negative correlation with 4'-demethylpodophyllotoxin ( $R = -0.968$ ), whereas the  $X_{JMT}$  demonstrated significant and positive correlation ( $R = 0.953$ ). The  $X_{FFP}$  was significantly and positively correlated with 4'-demethylepipodophyllotoxin ( $R = 0.988$ ) but significantly and negatively correlated with kaempferol ( $R = -0.967$ ). Quercetin was significantly and positively correlated to pH ( $R = 0.969$ ) but significantly and negatively correlated to  $X_{AAT}$  ( $R = -0.953$ ). Total lignan contents were significantly and positively correlated to  $X_{JMT}$  ( $R = 0.978$ ) but significantly and negatively correlated to  $X_{RH}$  ( $R = -0.964$ ).

In summary, active ingredients are determined by the specific ecological conditions of their growing locations. Some complexity existed between the ecological factors and active ingredients. It was difficult to identify the dominant ecological factors that influence the six active ingredients of *Sinopodophyllum hexandrum* through CA.

**Principal components analysis.** PCA was performed to search for a principal component that is representative of the six types of active ingredients (Table 6). The contribution rate reflected the amount of original information contained within each factor. The first two principal components had higher eigenvalues, and their accumulated contribution rates reached 95.316% (Table 6), indicating that the first two main components included nearly all of the information of the six original components. Therefore, they could be extracted to obtain the loading matrix by orthogonal rotation (Table 7). The equation for the first principal component  $F_1$  was  $F_1 = 0.959Y_P + 0.432Y_{DP} - 0.379Y_{DEP} + 0.974Y_{TL} + 0.878Y_Q + 0.912Y_K$ , whereas that of the second principal component  $F_2$  was  $F_2 = 0.246Y_P + 0.921Y_{DP} + 0.876Y_{DEP} + 0.057Y_{TL} + 0.321Y_Q - 0.221Y_K$ .  $F_1$  accounted for a large proportion of  $Y_P$  (0.959),  $Y_{TL}$  (0.974),  $Y_Q$  (0.878), and  $Y_K$  (0.912) and accounted for 86.776% of all principal components. In contrast,  $F_2$  accounted for a large proportion of  $Y_{DP}$  (0.921) and  $Y_{DEP}$  (0.876), but its contribution rate only accounted for 8.54% of all principal components. Therefore,  $F_1$  was selected as the principal component to represent the active ingredients present in the roots and rhizomes of *Sinopodophyllum hexandrum*.

**Gray correlation analysis.** GCA was conducted to deduce primary and secondary factors among the ecological factors based on gray correlation degree between the active ingredient contents and the ecological factors in this study [55,56]. The results of the analysis (Table 8) demonstrated that different ecological factors exerted different degrees of influence on the active ingredients: the primary ecological factors that affected the active ingredient contents were  $X_{AAP}$ ,  $X_{JMT}$ ,  $X_{FFP}$ ,  $X_{ASD}$ ,  $X_{PH}$ ,  $X_{OM}$ , and  $X_{RAPM}$  (gray correlation degree  $\geq 0.700$ ), whereas the secondary ecological factors were  $X_{AAT}$ ,  $X_{RH}$ , and  $X_{AMT}$  (gray correlation degree  $< 0.700$ ).

**Table 5. The correlation analysis between ecological factors and the active ingredients.**

| Items             | X <sub>RAN</sub> | X <sub>RAP</sub> | X <sub>RAPM</sub> | X <sub>IN</sub> | X <sub>TP</sub> | X <sub>TRM</sub> | X <sub>OM</sub> | X <sub>PH</sub> | X <sub>JAT</sub> | X <sub>JMT</sub> | X <sub>JAT</sub> | X <sub>JAT</sub> | X <sub>JAT</sub> | X <sub>ALT</sub> | X <sub>AHT</sub> | X <sub>ASD</sub> | X <sub>ASP</sub> | X <sub>RH</sub> | Y <sub>P</sub> | Y <sub>DP</sub> | Y <sub>DEP</sub> | Y <sub>TL</sub> | Y <sub>G</sub> | Y <sub>K</sub> |
|-------------------|------------------|------------------|-------------------|-----------------|-----------------|------------------|-----------------|-----------------|------------------|------------------|------------------|------------------|------------------|------------------|------------------|------------------|------------------|-----------------|----------------|-----------------|------------------|-----------------|----------------|----------------|
| X <sub>RAN</sub>  | 1                |                  |                   |                 |                 |                  |                 |                 |                  |                  |                  |                  |                  |                  |                  |                  |                  |                 |                |                 |                  |                 |                |                |
| X <sub>RAP</sub>  | -0.455           | 1                |                   |                 |                 |                  |                 |                 |                  |                  |                  |                  |                  |                  |                  |                  |                  |                 |                |                 |                  |                 |                |                |
| X <sub>RAPM</sub> | 0.437            | -0.442           | 1                 |                 |                 |                  |                 |                 |                  |                  |                  |                  |                  |                  |                  |                  |                  |                 |                |                 |                  |                 |                |                |
| X <sub>IN</sub>   | -0.516           | 0.816            | 0.441             | 1               |                 |                  |                 |                 |                  |                  |                  |                  |                  |                  |                  |                  |                  |                 |                |                 |                  |                 |                |                |
| X <sub>TP</sub>   | -0.332           | 0.848            | 0.372             | 0.993**         | 1               |                  |                 |                 |                  |                  |                  |                  |                  |                  |                  |                  |                  |                 |                |                 |                  |                 |                |                |
| X <sub>TRM</sub>  | 0.513            | 0.834            | 0.417             | 0.872           | 0.750           | 1                |                 |                 |                  |                  |                  |                  |                  |                  |                  |                  |                  |                 |                |                 |                  |                 |                |                |
| X <sub>OM</sub>   | -0.496           | -0.667           | -0.619            | -0.514          | -0.419          | -0.633           | 1               |                 |                  |                  |                  |                  |                  |                  |                  |                  |                  |                 |                |                 |                  |                 |                |                |
| X <sub>PH</sub>   | -0.679           | -0.487           | 0.499             | 0.447           | -0.538          | -0.546           | 0.408           | 1               |                  |                  |                  |                  |                  |                  |                  |                  |                  |                 |                |                 |                  |                 |                |                |
| X <sub>JAT</sub>  | 0.894            | -0.714           | -0.485            | -0.587          | -0.498          | 0.195            | -0.455          | -0.794          | 1                |                  |                  |                  |                  |                  |                  |                  |                  |                 |                |                 |                  |                 |                |                |
| X <sub>JMT</sub>  | 0.788            | 0.411            | -0.498            | -0.485          | -0.585          | 0.406            | -0.544          | -0.821          | 0.983**          | 1                |                  |                  |                  |                  |                  |                  |                  |                 |                |                 |                  |                 |                |                |
| X <sub>JAT</sub>  | 0.618            | -0.430           | 0.584             | -0.410          | -0.417          | 0.571            | -0.851          | -0.590          | 0.623            | 0.647            | 1                |                  |                  |                  |                  |                  |                  |                 |                |                 |                  |                 |                |                |
| X <sub>AHT</sub>  | 0.683            | 0.427            | -0.439            | -0.430          | -0.519          | 0.637            | -0.686          | -0.949*         | 0.888*           | 0.945*           | 0.474            | 1                |                  |                  |                  |                  |                  |                 |                |                 |                  |                 |                |                |
| X <sub>ALT</sub>  | 0.463            | 0.594            | 0.345             | -0.427          | -0.517          | 0.498            | -0.833          | -0.522          | 0.681            | 0.786            | 0.823            | 0.765            | 1                |                  |                  |                  |                  |                 |                |                 |                  |                 |                |                |
| X <sub>AHT</sub>  | 0.553            | -0.607           | -0.575            | -0.438          | -0.460          | -0.425           | 0.595           | -0.469          | 0.446            | 0.532            | -0.547           | 0.501            | -0.447           | 1                |                  |                  |                  |                 |                |                 |                  |                 |                |                |
| X <sub>ASP</sub>  | 0.719            | -0.542           | -0.401            | -0.518          | -0.466          | 0.524            | 0.708           | -0.84*          | 0.884*           | 0.831            | 0.493            | 0.795            | 0.527            | 0.797            | 1                |                  |                  |                 |                |                 |                  |                 |                |                |
| X <sub>ASD</sub>  | -0.779           | 0.669            | 0.470             | 0.624           | 0.574           | -0.518           | 0.813           | 0.753           | -0.900*          | -0.823           | -0.415           | -0.726           | -0.499           | -0.785           | -0.983**         | 1                |                  |                 |                |                 |                  |                 |                |                |
| X <sub>FFP</sub>  | 0.773            | -0.524           | -0.443            | -0.630          | -0.556          | 0.403            | -0.431          | -0.821          | 0.982**          | 0.951*           | 0.514            | 0.864            | 0.570            | 0.591            | 0.954*           | -0.985*          | 1                |                 |                |                 |                  |                 |                |                |
| X <sub>RH</sub>   | 0.543            | -0.514           | -0.613            | 0.580           | 0.756           | -0.803           | 0.831           | -0.835          | 0.777            | -0.878           | 0.546            | 0.734            | -0.483           | 0.537            | -0.883           | 0.782            | 0.724            | 1               |                |                 |                  |                 |                |                |
| Y <sub>P</sub>    | -0.438           | -0.751           | 0.506             | 0.810           | 0.866           | 0.816            | 0.458           | -0.963**        | 0.455            | 0.972**          | -0.539           | 0.476            | 0.513            | 0.443            | -0.902           | 0.934*           | 0.520            | -0.438          | 1              |                 |                  |                 |                |                |
| Y <sub>DP</sub>   | 0.632            | 0.833            | 0.693             | 0.347           | 0.542           | 0.776            | -0.968**        | 0.423           | 0.695            | 0.953*           | -0.733           | 0.814            | 0.724            | 0.446            | 0.716            | 0.915*           | 0.776            | 0.632           | 0.444          | 1               |                  |                 |                |                |
| Y <sub>DEP</sub>  | 0.782            | 0.490            | 0.591             | 0.579           | 0.556           | 0.473            | 0.514           | 0.889           | 0.732            | 0.575            | -0.773           | 0.467            | 0.515            | 0.828            | -0.847           | 0.988**          | 0.480            | 0.554           | 0.667          | 1               |                  |                 |                |                |
| Y <sub>TL</sub>   | 0.799            | -0.614           | 0.535             | 0.779           | 0.706           | 0.363            | -0.950*         | 0.969**         | -0.703           | -0.896*          | -0.953*          | 0.707            | 0.631            | 0.456            | 0.798            | 0.918*           | 0.641            | 0.538           | 0.643          | 0.823           | 0.553            | 1               |                |                |
| Y <sub>G</sub>    | 0.654            | 0.878            | 0.765             | 0.882           | 0.872           | 0.711            | 0.553           | -0.907*         | -0.575           | -0.438           | -0.460           | -0.425           | 0.595            | -0.469           | 0.446            | 0.932*           | -0.967**         | 0.955**         | -0.438         | -0.460          | -0.425           | 0.654           | 1              |                |
| Y <sub>K</sub>    | 0.731            | 0.786            | 0.831             | 0.869           | 0.843           | 0.738            | -0.933          | *0.635          | -0.478           | 0.978**          | -0.524           | -0.603           | 0.610            | -0.565           | 0.536            | 0.881            | 0.907*           | -0.964**        | 0.501          | 0.570           | -0.534           | 0.547           | 0.436          | 1              |

**Note:** \* Significant at  $P < 0.05$

\*\* Significant at  $P < 0.01$ .

X<sub>RAN</sub>, X<sub>RAP</sub>, X<sub>RAPM</sub>, ..., X<sub>RH</sub> was performed in the Table 2, respectively. Y<sub>P</sub>-Podophyllotoxin, Y<sub>DP</sub>-4'-Demethylpodophyllotoxin, Y<sub>DEP</sub>-4'-Demethylpodophyllotoxin, Y<sub>TL</sub>-Total lignans, Y<sub>G</sub>-Quercetin, Y<sub>K</sub>-Kaempferol.

doi:10.1371/journal.pone.0122981.t005



**Table 6. Eigenvalues and cumulative contribution rates of principal components.**

| Principal components | Eigenvalues | Contribution rates (%) | Cumulative contribution rates (%) |
|----------------------|-------------|------------------------|-----------------------------------|
| F <sub>1</sub>       | 4.860       | 86.776                 | 86.776                            |
| F <sub>2</sub>       | 1.553       | 8.54                   | 95.316                            |
| F <sub>3</sub>       | 0.338       | 2.337                  | 97.653                            |
| F <sub>4</sub>       | 0.127       | 1.418                  | 99.071                            |
| F <sub>5</sub>       | 0.052       | 0.653                  | 99.724                            |
| F <sub>6</sub>       | 0.022       | 0.276                  | 100                               |

**Note:** All the original data were standardized.

doi:10.1371/journal.pone.0122981.t006

On the other hand, although the primary ecological factors can be clarified by GCA, the correlations between the active ingredients and different primary ecological factors were still unclear.

**Path analysis.** A path analysis was carried out between the principal component (F<sub>1</sub>) and the primary ecological factors, including X<sub>AAP</sub>, X<sub>JMT</sub>, X<sub>FFP</sub>, X<sub>ASD</sub>, X<sub>PH</sub>, X<sub>OM</sub>, and X<sub>RAPM</sub>, which was used to express the correlation degree between them [57]. Most of the primary factors had negative and direct effects on the contents of the active ingredients (Table 9). The indirect effect of the primary factors on active ingredients was generally weaker than their direct effect, except for X<sub>RAPM</sub> and X<sub>OM</sub>, indicating that the ecological factors screened by GCA played a direct and decisive role in the synthesis and accumulation of the active ingredients. X<sub>PH</sub> had the most negative direct effect (- 0.9936) of all of the primary ecological factors but the lowest correlation coefficient (0.1157; the lowest significance level) with the active ingredients because its negative direct effect was counterbalanced by the positive indirect effects of X<sub>FFP</sub>, X<sub>AAP</sub>, X<sub>JMT</sub>, X<sub>OM</sub>, X<sub>ASD</sub>, and X<sub>OM</sub>. In terms of indirect effects, X<sub>OM</sub> had a larger contribution (0.9961) than any other factor and mainly had a positive and indirect effect through X<sub>RAPM</sub>, X<sub>AAP</sub>, and X<sub>JMT</sub> in the accumulation of the active ingredients, weakening their negative and direct effects. Thus, significant and positive correlations ( $P < 0.05$ ) were observed between X<sub>OM</sub> and the active ingredients. Obviously, a stronger direct effect between the primary ecological factors and the active ingredients did not always imply a higher correlation between them. The statistical significance (Table 9) in this study demonstrated that the higher the X<sub>AAP</sub> and X<sub>JMT</sub>, the lower the contents of the active ingredients, and that the longer the X<sub>ASD</sub> and the X<sub>FFP</sub> and the higher the X<sub>OM</sub>, the higher the contents of the active ingredients. At the same time, the results of ANOVA analysis (Table 10) was significant ( $F = 35.268, P < 0.01$ ), which confirmed the

**Table 7. Load matrix of the principal components.**

| Active ingredients | Load                                            |                                                  |
|--------------------|-------------------------------------------------|--------------------------------------------------|
|                    | The first principal component (F <sub>1</sub> ) | The second principal component (F <sub>2</sub> ) |
| Y <sub>P</sub>     | 0.959                                           | 0.246                                            |
| Y <sub>DP</sub>    | 0.432                                           | 0.921                                            |
| Y <sub>DEP</sub>   | -0.379                                          | 0.876                                            |
| Y <sub>TL</sub>    | 0.974                                           | 0.057                                            |
| Y <sub>Q</sub>     | 0.878                                           | 0.321                                            |
| Y <sub>K</sub>     | 0.912                                           | -0.221                                           |

**Note:** Y<sub>P</sub>-Podophyllotoxin, Y<sub>DP</sub>-4'-Demethylpodophyllotoxin, Y<sub>DEP</sub>-4'-Demethylepipodophyllotoxin, Y<sub>TL</sub>-Total lignans, Y<sub>Q</sub>-Quercetin, Y<sub>K</sub>-Kaempferol.

doi:10.1371/journal.pone.0122981.t007

**Table 8. Gray correlation coefficients between the principal components and ecological factors.**

| Ecological factors | Gray correlation coefficients | Ecological factors | Gray correlation coefficients |
|--------------------|-------------------------------|--------------------|-------------------------------|
| X <sub>RAN</sub>   | 0.474                         | X <sub>JMT</sub>   | 0.832                         |
| X <sub>RAP</sub>   | 0.402                         | X <sub>AAT</sub>   | 0.667                         |
| X <sub>RAPM</sub>  | 0.723                         | X <sub>AHT</sub>   | 0.520                         |
| X <sub>TN</sub>    | 0.423                         | X <sub>ALT</sub>   | 0.554                         |
| X <sub>TP</sub>    | 0.316                         | X <sub>AMT</sub>   | 0.618                         |
| X <sub>TPM</sub>   | 0.357                         | X <sub>AAP</sub>   | 0.854                         |
| X <sub>OM</sub>    | 0.756                         | X <sub>ASD</sub>   | 0.789                         |
| X <sub>pH</sub>    | 0.778                         | X <sub>FFP</sub>   | 0.807                         |
| X <sub>JAT</sub>   | 0.579                         | X <sub>RH</sub>    | 0.643                         |

**Note:** X<sub>RAN</sub>, X<sub>RAP</sub>, X<sub>RAPM</sub>, . . . , X<sub>RH</sub> was performed in the [Table 2](#), respectively.

doi:10.1371/journal.pone.0122981.t008

availability and rationality of PA. The action pathway between the ecological factors and the principal components (F<sub>1</sub>) is complicated. Thus, we can't be sure which factors play a decisive role in the production of the active ingredients among the seven primary ecological factors using PA. Further analyses were conducted to identify the determinant factors and their comprehensive decisive degree.

**Analysis of decisive degree.** The determinant factors and comprehensive decisive degree were assessed using the determination coefficient in analysis of decisive degree (ADD) [58]. The determination coefficient R<sub>(i)</sub> (determination ability) of each factor X<sub>i</sub> (independent variable) to Y<sub>1</sub> (dependent variable) was expressed by the formula and calculated on basis of PA data as well as the multivariate determination coefficient R<sub>0</sub><sup>2</sup> (the total determination ability) and the determination coefficient P<sub>e</sub> of those unconsidered factors in [Table 11](#) in the present polyfactorial system that contained many factors and interaction effects.

The determination coefficients for X<sub>JMT</sub>, X<sub>FFP</sub>, X<sub>ASD</sub>, and X<sub>AAP</sub> were positive, indicating that these four ecological factors had strong and comprehensive influences on the active ingredient contents of *Sinopodophyllum hexandrum* and can be considered important determinant factors. The X<sub>AAP</sub> was the most important determinant factor, as R<sub>(AAP)</sub> value was the highest. The determination coefficients of X<sub>RAPM</sub>, X<sub>pH</sub>, and X<sub>OM</sub> were negative, indicating that they were important limiting factors. Compared with the soil factors (X<sub>RAPM</sub>, X<sub>pH</sub>, and X<sub>OM</sub>), climate factors (X<sub>JMT</sub>, X<sub>FFP</sub>, X<sub>ASD</sub>, and X<sub>AAP</sub>) had a stronger influence on the contents of the

**Table 9. Path analysis between the contents of active ingredients and primary ecological factors.**

| F                 | P      | C       | D       | ID      |                    |                  |                  |                   |                   |                   |                   |  |
|-------------------|--------|---------|---------|---------|--------------------|------------------|------------------|-------------------|-------------------|-------------------|-------------------|--|
|                   |        |         |         | Total   | →X <sub>RAPM</sub> | →X <sub>OM</sub> | →X <sub>pH</sub> | →X <sub>JMT</sub> | →X <sub>AAP</sub> | →X <sub>ASD</sub> | →X <sub>FFP</sub> |  |
| X <sub>RAPM</sub> | 0.2341 | 0.1769  | -0.7983 | 0.9752  |                    |                  |                  |                   |                   |                   |                   |  |
| X <sub>OM</sub>   | 0.0353 | 0.8087  | -0.1874 | 0.9961  | 0.7686             |                  | -0.3205          | 0.3212            | 0.4535            | -0.1011           | -0.1256           |  |
| X <sub>pH</sub>   | 0.3040 | -0.1157 | -0.9936 | 0.8779  | -0.2306            | 0.2676           |                  | 0.3532            | 0.3606            | -0.3085           | 0.4356            |  |
| X <sub>JMT</sub>  | 0.0062 | -0.9179 | -0.4609 | -0.457  | -0.4657            | -0.3229          | 0.324            |                   | 0.2525            | 0.3028            | -0.5477           |  |
| X <sub>AAP</sub>  | 0.0002 | -0.9616 | -0.6753 | -0.2863 | -0.8286            | -0.0076          | 0.1021           | 0.3246            |                   | 0.1087            | 0.0145            |  |
| X <sub>ASD</sub>  | 0.0124 | 0.9007  | 0.9331  | -0.0324 | 0.0867             | -0.2281          | 0.0811           | 0.1507            | 0.0228            |                   | -0.1456           |  |
| X <sub>FFP</sub>  | 0.0273 | 0.8468  | 0.7626  | 0.0842  | 0.3117             | 0.0262           | 0.071            | -0.1255           | 0.0456            | -0.2448           |                   |  |

**Note:** F-Factors; P-P value; C-Correlation coefficients; D-Direct path coefficients; ID-Indirect path coefficients. Absolute value of path coefficients (direct and indirect path coefficients) were used for analysis.

doi:10.1371/journal.pone.0122981.t009

**Table 10. Analysis of variance (ANOVA) for the contents of active ingredients and seven primary ecological factors.**

| Model      | Sum of squares | df | Mean square | F value | Significance |
|------------|----------------|----|-------------|---------|--------------|
| Regression | 711.991        | 7  | 101.713     | 35.268  | 0.003        |
| Residual   | 138.432        | 48 | 2.884       |         |              |
| Total      | 850.423        | 55 | 104.597     |         |              |

doi:10.1371/journal.pone.0122981.t010

active ingredients in the roots and rhizomes of *S. hexandrum*. This finding indicated the importance of controlling climate conditions in the production process of *S. hexandrum* to produce high-quality medicinal materials for the treatment of human diseases.

## Discussion

### Variation in active ingredient contents

The metabolism and accumulation of active ingredients are strongly affected, either directly or indirectly, by environmental factors. Most plants regulate the types and amount of active ingredients according to environmental variations. In this study, significant differences were observed in the active ingredient contents in the roots and rhizomes of *Sinopodophyllum hexandrum* planted at different production locations (Fig 3), whereas insignificant differences were noted in the types of constituents (Fig 2, Table 4). These results were consistent with previous reports [15]. The results indicated that the active ingredient contents were closely related to the growing locations of *S. hexandrum* and environmental factors thereof influenced the production of active ingredients.

**Table 11. Determination coefficients of primary ecological factors.**

| Factors                                                                                | Related formulas and computations                                                                    |
|----------------------------------------------------------------------------------------|------------------------------------------------------------------------------------------------------|
|                                                                                        | $R_{(ij)} = P_i^2 + 2 \sum_{k \neq i} P_i P_{ik} = d_i + \sum_{k \neq i} d_{ik} = 2P_i r_{iy} - d_i$ |
|                                                                                        | $R_0^2 = \sum_{i=1}^m d_i + 2 \sum_{i < j} P_i P_{ij}$                                               |
|                                                                                        | $P_e = \sqrt{1 - R_0^2}$                                                                             |
| $X_{RAPM}$                                                                             | $R_{(RAPM)} = 2 \times (-0.7983) \times (0.1769) - (-0.7983)^2 = -0.9197$                            |
| $X_{OM}$                                                                               | $R_{(OM)} = 2 \times (-0.1874) \times (0.8087) - (-0.1874)^2 = -0.3382$                              |
| $X_{pH}$                                                                               | $R_{(pH)} = 2 \times (-0.9936) \times (-0.1157) - (-0.9936)^2 = -0.7573$                             |
| $X_{JMT}$                                                                              | $R_{(JMT)} = 2 \times (-0.4609) \times (-0.9179) - (-0.4609)^2 = 0.6337$                             |
| $X_{AAP}$                                                                              | $R_{(AAP)} = 2 \times (-0.6753) \times (-0.9616) - (-0.6753)^2 = 0.8427$                             |
| $X_{ASD}$                                                                              | $R_{(ASD)} = 2 \times (0.9331) \times (0.9007) - (0.9331)^2 = 0.8102$                                |
| $X_{FFP}$                                                                              | $R_{(FFP)} = 2 \times (0.7626) \times (0.8468) - (0.7626)^2 = 0.7100$                                |
| $R_0^2$                                                                                | $R_0^2 = 3.7803 + 2 \times (-1.3995) = 0.9813$                                                       |
| $P_e$                                                                                  | $P_e = \sqrt{1 - 0.9813} = 0.1367$                                                                   |
| $R_{(AAP)} > R_{(ASD)} > R_{(FFP)} > R_{(JMT)} > 0 > R_{(OM)} > R_{(pH)} > R_{(RAPM)}$ |                                                                                                      |

**Note:**  $i, j = 1, 2, \dots, m$ ;  $P_i$ , direct path coefficient;  $P_{ij}$ , total of indirect path coefficients;  $r_{iy}$ , correlation coefficient between  $X_i$  and  $Y$ ;

$d_i = P_i^2$ ; see Table 9.  $R_{(ij)}$ , determination coefficient (determination ability) of each factor  $X_i$  (independent variable) to  $Y_i$  (dependent variable);  $R_0^2$ , the multivariate determination coefficient (the total determination ability) of the seven primary ecological factors;  $P_e$ , determination coefficient of those unconsidered factors.

doi:10.1371/journal.pone.0122981.t011

The contents of PTOX in the roots and rhizomes of *Sinopodophyllum hexandrum* were correlated with latitude and altitude to some degree. The higher the latitude (northerly) and the lower the altitude, the higher the contents of PTOX, and the lower the latitude (southerly) and the higher the altitude, the lower the contents of PTOX (Figs 1 and 3, Table 1). For example, the PTOX contents in the roots and rhizomes of *S. hexandrum* planted in Jingyuan, Ningxia (northerly, 2 488 m), and Yongdeng, Gansu (northerly, 2 500 m), were higher than those planted in Shangri-La, Yunnan (southerly, 3300 m) and Nyingchi, Tibet (southerly, 3100 m). The trend for quercetin and kaempferol contents was opposite to that of PTOX, being the highest in Nyingchi, Tibet, and Shangri-La, Yunnan, respectively. Interestingly, the altitude of these two production locations was also high. Quercetin and kaempferol present an ortho-dihydroxylated structure, exhibiting ultraviolet absorption and free-radical scavenging, allowing the *S. hexandrum* plant to grow healthily under the strong ultraviolet radiation in higher altitude areas [59–61]. Altitude and latitude, two important factors that affect the hydrothermal conditions of plant growth environment, have important effects on plant secondary metabolic processes. Thus, the causes of the correlation between the active ingredient contents and these two factors in their growing locations require further study by adopting molecular biology methods associated with ecological factors, and reproductive and vegetative factors.

### Precipitation and active ingredient contents

In this study, ADD revealed that the  $X_{AAP}$  was the most important determinant factor (Table 11). At the same time, GCA and PA also showed that the strongest negative correlation existed between  $X_{AAP}$  and the contents of the active ingredients (Tables 8 and 9). This finding was consistent with the previous research results about other active substances. For example, the quinine content of *Cinchona ledgeriana* (Howard) Bern. Moens ex Trimen was higher under high-temperature and drought conditions and significantly lower under excessive soil humidity, even to the point of not being synthesized at all. The atropine content of *Anisodus carniolicoides* (C.Y. Wu & C. Chen) D'Arcy & Zhi Y. Zhang could be as high as 1% under dry conditions, which is 2.5 times greater than that obtained under humid conditions (0.4%). The high soil moisture content sharply decreased the alkaloid contents of *Ephedra intermedia* Schrenk ex C.A. Mey., which increased under dry conditions [62]. By contrast, the active ingredient contents of some medicinal plants, such as the ipapine glucosinolate content of *Sinapis alba* L., increased with increased precipitation [63].

### Sunshine duration and active ingredient contents

The illumination can affect the active ingredient contents of medicinal plants [62]. To some plants, the increase of illumination time can increase the contents of active ingredients. Dong et al. reported the influence of environmental factors on the contents of secondary metabolites in the leaves of *Eucommia ulmoides* Oliv. and found that annual sunshine duration was significantly and positively correlated to the contents of geniposidic acid ( $P < 0.05$ ) [37]. Zhu et al. [64] found that the total saponin contents of *Panax quinquefolius* L. increased linearly by 6.75% to a maximum of 8.72% with annual sunshine duration in the altitude range of 530 m to 850 m. Meanwhile, the total saponin contents dramatically decreased because of the sharp reduction in annual sunshine duration caused by the existence of a strong fog and cloud belt in the altitude range of 850 m to 1000 m, decreasing by 1.38% for every 100 m. Fuglevand et al. also confirmed that the amounts of flavonoids in *Arabidopsis* (DC.) Heynh. increased after long time illumination [59]. *Sinopodophyllum hexandrum* is a heliophilous plant, thus, locations with long sunshine durations would be favorable for its secondary metabolism, resulting in an adequate substrate to catalyze the synthesis of the active ingredients and thereby

increasing their contents. PA and ADD showed that the active ingredient contents were highly associated with sunshine duration, with a significant and positive correlation (Tables 9 and 11), indicating that annual sunshine duration ( $X_{ASD}$ ) was an important ecological factor for the synthesis and accumulation of the active ingredients in the roots and rhizomes of *S. hexandrum*.

### Temperature and active ingredient contents

The production of secondary metabolites due to temperature stress is an expression of the self-defense mechanism of medicinal plants. Environmental temperature significantly affects the contents of secondary metabolites in plants [65]. For example, the hypericin contents in *Hypericum perforatum* L. increased with temperature [65], as did the contents of anthocyanin in sugarcane [66]. In the leaves of *Eucommia ulmoides* Oliv., annual average temperature was significantly and positively correlated to the contents of chlorogenic acid and flavonoids ( $P < 0.05$ ) [37]. Similarly, PA showed that the contents of active ingredients were significantly and positively correlated with july mean temperature ( $X_{JMT}$ ) in this study (Table 9), but with the lowest positive decisive degree of all factors (Table 11). This was possibly related to the chemical structure of the active ingredients, which can easily decompose at high temperature.

### Soil and active ingredient contents

The active ingredient contents and the quality of medicinal plants are closely related to soil fertility [62]. As observed from the sequence of determination coefficients of the seven primary ecological factors,  $X_{RAPM}$  was important limiting factor, followed by  $X_{pH}$ . However, these factors were not significantly correlated with the active ingredient contents at 0.05 (Table 9). Thus,  $X_{OM}$ , with a positive and significant correlation to the active ingredient contents, was considered as the most important limiting factor. This result agreed with the findings for other active ingredients involved in medicinal plants. For example, Liu *et al.* [67] found that the saponin contents of *Panax quinquefolius* L. were increased by 27.86% by the repeated applications of high-quality organic fertilizer and that the functionality of potassic fertilizer was the same as that of a total nutrient admixture in terms of saponin contents. These findings were similar to those for the active ingredients in *Sinopodophyllum hexandrum*. Notably, although  $X_{pH}$  had the strongest direct effect on the active ingredient contents (Table 9), its decisive degree was not high (Table 11) because the accumulation and synthesis of the active ingredients was an overall reflection of the interaction of multiple ecological factors, such as temperature, humidity, and solar radiation.

### *Sinopodophyllum hexandrum* geo-authenticity

The quality of medicinal herbs is closely related to the local growth environment. Differences in production location would lead to differences in ecological factors, such as precipitation, illumination, temperature, humidity, and soil (Table 2), which would in turn lead to variation in the contents of active ingredients in this medicinal plant (Fig 3). The final result is differences in the medicinal quality and therapeutic effects of these plants. The quality of medicinal plants is specific to their environmental conditions, which corresponds to the concept of geo-authentic herbal drugs developed based on the experience of ancient people. However, these conditions do not always hold because the ancient people judged the quality of medicinal drugs only by their external quality and their medical experience. They were unaware of so called active chemical ingredients in medicinal plants [37]. The geo-authentic region of *S. hexandrum* has yet to be elucidated. In the present research, the key finding was that  $R_0^2$  of the seven primary ecological factors was 0.9813, whereas the determination coefficient  $P_e$  of those unconsidered



factors was only 0.1367 (Table 11). This finding demonstrated that the effect of ecological factors on the geographical variation of the active ingredient contents in roots and rhizomes of *S. hexandrum* was up to 98.13%, implying that the ecological factors explained 98.13% of the geographical variation of the active ingredient contents, which was consistent with previous studies [42,43]. Therefore, the results provided reliable reference data upon which to base decisions regarding understanding the influence of ecological factors on the variation of phytochemicals in *S. hexandrum* and selection of geo-authentic regions for yielding optimal medicinal raw materials. *S. hexandrum* is native to the Himalayan region, including China, India, Nepal, Myanmar, Afghanistan and Pakistan. No other chemical ecology studies of *S. hexandrum* exist in other locations. A comprehensive and systematic study including more populations in other regions of China and countries combined with molecular ecology and physiological ecology is required in a future study.

## Conclusions

The ecological factors significantly affected the active ingredient contents of the roots and rhizomes of *Sinopodophyllum hexandrum*, which contributed to their significant geographical differences in different production locations throughout China. The primary ecological factors affecting the active ingredient contents included annual average precipitation, July average temperatures, frost-free period, annual sunshine duration, soil pH, organic matter, and rapidly available potassium. The annual average precipitation was the most important determinant factor, being significantly and negatively correlated with the active ingredients ( $P < 0.001$ ). A significant and positive correlation was observed between the annual sunshine duration and frost-free period and the active ingredient contents, whereas a significant and negative correlation was observed between July average temperature and the active ingredient contents. Organic matter, soil pH, and rapidly available potassium were the limiting factors; specifically, organic matter was the most important limiting factor, with a positive and significant correlation with the active ingredient contents. The selection of favorable production locations should be prioritized and the collection was scientifically carried out under the permission of local management departments for sustainable collection when attempting to harvest high-quality wild resources of *S. hexandrum*. Integrating the findings for all of the active ingredients and the ecological factors of each production location, it was concluded that Jingyuan in Ningxia Province and Yongdeng in Gansu Province were favorable production locations for *S. hexandrum* containing satisfactory PTOX and lignans and that Shangri-La in Yunnan Province and Nyingchi in Tibet were favorable for the production of *S. hexandrum* containing satisfactory quercetin and kaempferol contents.

## Supporting Information

**S1 Table. The names of the authorities who issued the permission for each location.**  
(DOCX)

**S2 Table. The names of local meteorological bureaus (stations) for each location.**  
(DOCX)

**S1 Text. Description of the sampling procedures.**  
(DOC)

## Acknowledgments

We are grateful to Genlu Bai, Guowei Xia and all the colleagues in the same laboratory for the assistance in the work.

## Author Contributions

Conceived and designed the experiments: WL JJJ. Performed the experiments: WL DXY XWZ. Analyzed the data: WL. Contributed reagents/materials/analysis tools: JJJ. Wrote the paper: WL.

## References

1. Oksman-Caldentey KM, Inze D (2004) Plant cell factories in the post-genomic era: new ways to produce designer secondary metabolites. *Trends Plant Sci* 9: 433–440. PMID: [15337493](#)
2. Dong JE, Ma XH, Wei Q, Peng SB, Zhang SC (2011) Effects of growing location on the contents of secondary metabolites in the leaves of four selected superior clones of *Eucommia ulmoides*. *Ind Crop Prod* 34: 1607–1614.
3. Editorial committee of Flora of China (2011) *Flora of China* (Vol. 19). Beijing & St. Louis: Science Press & Missouri Botanical Garden Press. 783 p.
4. Fay DA, Ziegler HW (1985) Botanical source differentiation of Podophyllum resin by high performance liquid chromatography. *J. Liq. Chromatogr* 8: 1501–1506.
5. Giri A, Narasu ML (2000) Production of podophyllotoxin from *Podophyllum hexandrum*: A potential natural product for clinically useful anticancer drugs. *Cytotechnology* 34: 17–26. doi: [10.1023/A:1008138230896](#) PMID: [19003377](#)
6. Stahelin HF, Von Warburg A (1991) The chemical and biological route From Podophyllotoxin glucoside to etoposide: ninth can memorial award lecture. *Cancer Res* 51: 5–11. PMID: [1988106](#)
7. Kamil WM, Dewick PM (1986) Biosynthetic relationship of aryltetralin lactone lignans to dibenzylbutyrolactone lignans. *Phytochemistry* 25: 2093–2102.
8. Holthuis JJM (1988) Etoposide and teniposide. Biosynthesis, metabolism and clinical pharmacokinetics. *Pharm Weekbl (Sci)* 10: 101–116. PMID: [3047665](#)
9. Imbert TF (1998) Discovery of podophyllotoxin. *Biochimie* 80: 207–222. PMID: [9615861](#)
10. Ayres DC, Lim CK (1976) Lignans and related phenols. Part XV. Remote substituent effects on the rates and products of some reactions of aryltetrahydronaphthalenes. *J Chem Soc Perkin Trans 1*: 832–836.
11. Canel C, Dayan FE, Ganzera M, Khan IA, Rimando A, Burandt CL Jr, et al. (2001) High yield of podophyllotoxin from leaves of *Podophyllum peltatum* by in situ conversion of podophyllotoxin 4-O- $\beta$ -D glucopyranoside. *Planta Med* 67: 97–99. PMID: [11270736](#)
12. Rickard-Bon SE, Thompson LU (2003) The role of flaxseed lignans in hormone-dependent and independent cancer. In: Muir AD, Westcott ND, editors. *Flax, the genus Linum*. London: Taylor and Francis Inc. pp. 181–203.
13. Svensson B, Pettersson H (2003) Reumacon (CPH-82) showed similar X-ray progression and clinical effects as methotrexate in a two-year comparative study on patients with early rheumatoid arthritis. *Scand J Rheumatol* 32: 83–88. PMID: [12737326](#)
14. Lin MC, Lin JH, Chen SK, Cheng YW, Cheng HW (2008) Simultaneous Determination of Podophyllotoxin, Quercetin and Kaempferol in Podophyllin by Liquid Chromatography Tandem Mass Spectrometry. *J Food Drug Anal* 16: 29–40.
15. Zhou Y, Jiang SY, Ding LS, Cheng SW, Xu HX, But PPH, et al. (2008) Chemical Fingerprinting of Medicinal Plants “Gui-jiu” by LC-ESI Multiple-Stage MS. *Chromatographia* 68: 781–789.
16. Rice-Evans C (2001) Flavonoid antioxidants. *Curr Med Chem* 8: 797–807. PMID: [11375750](#)
17. Tzeng SH, Ko WC, Ko FN, Teng CM (1991) Inhibition of platelet aggregation by some flavonoids. *Thromb Res* 64: 91–100. PMID: [1776142](#)
18. Cao G, Russell RM, Lischner N, Prior RL (1998) Serum antioxidant capacity is increased by consumption of strawberries, spinach, red wine or vitamin C in elderly women. *J Nutr* 128: 2383–2390. PMID: [9868185](#)
19. Carollo C, Presti RL, Caimi G (2007) Wine, diet, and arterial hypertension. *Angiology* 58: 92–96. PMID: [17351163](#)
20. Convention on International Trade in Endangered Species of Wild Fauna and Flora (CITES) (2007). CoP14 Prop. 27: 1–14. Available: <http://cites.org/sites/default/files/esp/cop14/prop/S14-P27.pdf>.

21. Lata H, Moraes RM, Bertoni B, Pereira Ana MS (2010) In vitro germplasm conservation of *Podophyllum peltatum* L. under slow growth conditions. *In Vitro Cell Dev Biol-Plant* 46: 22–27.
22. Liu W, Yin DX, Liu JJ, Li N (2014) Genetic diversity and structure of *Sinopodophyllum hexandrum* (Royle) Ying in the Qinling Mountains, China. *PLoS ONE* 9: e110500. doi: [10.1371/journal.pone.0110500](https://doi.org/10.1371/journal.pone.0110500) PMID: [25333788](https://pubmed.ncbi.nlm.nih.gov/25333788/)
23. Purohit MC, Bahuguna R, Maithani UC, Rawat MSM (1999) Variation in Podophylloresin and Podophyllotoxin content in different populations of *Podophyllum hexandrum*. *Curr Sci India* 77: 1078–1079.
24. Zhao CQ, Cao W, Nagatsu A, Ogihara Y (2001) Three New Glycosides from *Sinopodophyllum emodi* (Wall) Ying. *Chem Pharm Bull* 49: 1474–1476. PMID: [11724242](https://pubmed.ncbi.nlm.nih.gov/11724242/)
25. Kong Y, Xiao JJ, Meng SC, Dong XM, Ge YW, Wang RF, et al. (2010) A new cytotoxic flavonoid from the fruit of *Sinopodophyllum hexandrum*. *Fitoterapia* 81: 367–370. doi: [10.1016/j.fitote.2009.11.003](https://doi.org/10.1016/j.fitote.2009.11.003) PMID: [19909799](https://pubmed.ncbi.nlm.nih.gov/19909799/)
26. Zhao CQ, Zhu YY, Chen SY, Ogihara Y (2011) Lignan glucoside from *Sinopodophyllum emodi* and its cytotoxic activity. *Chinese Chem Lett* 22: 181–184.
27. Sun YJ, Li ZL, Chen H, Liu XQ, Zhou W, Hua HM (2011) Three new cytotoxic aryltetralin lignans from *Sinopodophyllum emodi*. *Bioorg Med Chem Lett* 21: 3794–3797. doi: [10.1016/j.bmcl.2011.04.036](https://doi.org/10.1016/j.bmcl.2011.04.036) PMID: [21570846](https://pubmed.ncbi.nlm.nih.gov/21570846/)
28. Inamori Y, Kubo M, Tsujibo H, Ogawa M, Baba K, Kozawa M, et al. (1986) The biological activities of podophyllotoxin compounds. *Chem pharm Bull* 34: 3928–3932. PMID: [3815613](https://pubmed.ncbi.nlm.nih.gov/3815613/)
29. Goel HC, Prasad J, Sharma A, Singh B (1998) Antitumour and radioprotective action of *Podophyllum hexandrum*. *Indian J Exp Biol* 36: 583–587. PMID: [9731473](https://pubmed.ncbi.nlm.nih.gov/9731473/)
30. Chattopadhyay S, Bisaria VS, Panda AK, Srivastava AK (2004) Cytotoxicity of invitro produced podophyllotoxin from *Podophyllum hexandrum* on human cancer cell line. *Nat Prod Res* 18: 51–57. PMID: [14974618](https://pubmed.ncbi.nlm.nih.gov/14974618/)
31. Reddy PB, Paul DV, Agrawal SK, Saxena AK, Kumar HMS, Qazi GN (2008) Design, synthesis, and biological testing of 4b-[4-Substituted)-1,2,3-triazol-1-yl] podophyllotoxin analogues as antitumor agents. *Arch Pharm Chem Life Sci* 341: 126–131.
32. Zhu CG, Yang J, Xiong Y (2004) Research progress in natural antineoplastic podophyllotoxin and its derivatives. *Drug Eval* 1: 306.
33. Xiao M, Li Q, Guo L, Luo T, Duan WX, He WX, et al. (2006) AFLP analysis of genetic diversity of the endangered species *Sinopodophyllum hexandrum* in the Tibetan region of Sichuan Province, China. *Biochem Genet* 44: 47–59. PMID: [16724277](https://pubmed.ncbi.nlm.nih.gov/16724277/)
34. Xiao M, Li Q, Wang L, Guo L, Li J, Tang L, et al. (2006) ISSR Analysis of the genetic diversity of the endangered Species *Sinopodophyllum hexandrum* (Royle) Ying from Western Sichuan Province, China. *J Integr Plant Bio* 48: 1140–1146.
35. Nadeem M, Palni LMS, Purohit AN, Pandey H, Nandi SK (2000) Propagation and conservation of *Podophyllum hexandrum* Royle: an important medicinal herb. *Bio Conserv* 92: 121–129.
36. Li Y, Zhai SN, Qiu YX, Guo YP, Ge XJ, Comes HP (2011) Glacial survival east and west of the 'Me-kong–Salween Divide' in the Himalaya–Hengduan Mountains region as revealed by AFLPs and cpDNA sequence variation in *Sinopodophyllum hexandrum* (Berberidaceae). *Mol Phylogenet Evol* 59: 412–424. doi: [10.1016/j.ympev.2011.01.009](https://doi.org/10.1016/j.ympev.2011.01.009) PMID: [21296173](https://pubmed.ncbi.nlm.nih.gov/21296173/)
37. Dong JE, Ma XH, Wei Q, Peng SB, Zhang SC (2011) Effects of growing location on the contents of secondary metabolites in the leaves of four selected superior clones of *Eucommia ulmoides*. *Ind Crop Prod* 34: 1607–1614.
38. Searles PS, Flint SD, Caldwell MM (2001) A meta-analysis of plant field studies simulating stratospheric ozone depletion. *Oecologia* 127: 1–10.
39. Zidom C, Stuppner H (2001) Evaluation of chemosystematic characters in the genus *Leontodon*. *Taxon* 50: 115–133.
40. Peñuelas J, Llusià J (1997) Effects of carbon dioxide, water supply, and seasonally on terpene content and emission by *Rosmarinus officinalis*. *J Chem Ecol* 23: 979–993.
41. Hu SL (1998) *Geo-authentic traditional Chinese herbal drugs*. Jinan: Shandong Science and Technology Press. (In Chinese.).
42. Alam A, Naik PK, Gulati P, Gulati AK, Mishra GP (2008) Characterization of genetic structure of *Podophyllum hexandrum* populations, an endangered medicinal herb of Northwestern Himalaya, using ISSR-PCR markers and its relatedness with podophyllotoxin content. *Afr J Biotechnol* 7: 1028–1040.
43. Alam MA, Gulati P, Aswini KG, Gyan PM, Pradeep KN (2009) Assessment of genetic diversity among *Podophyllum hexandrum* genotypes of Northwestern Himalayan region for podophyllotoxin production. *Indian J Biotechnol* 8: 391–399.

44. Sparks DL, Page AL, Helmke PA, Loeppert RH, Soltanpour PN, Tabatabai MA, et al. (1996) Methods of soil analysis. Part 3-Chemical methods. Madison, USA: Soil Science Society of America Inc.
45. Yang LW, Wu DH, Tang X, Peng W, Su WW (2005) Fingerprint quality control of Tianjihuang by high-performance liquid chromatography–photodiode array detection. *J Chromatogr A* 1070: 35–42. PMID: [15861785](#)
46. Lu GH, Chan K, Liang YZ, Leung K, Chan CL, Jiang ZH, et al. (2005) Development of high-performance liquid chromatographic fingerprints for distinguishing Chinese Angelica from related umbelliferae herbs. *J Chromatogr A* 1073: 383–341. PMID: [15909545](#)
47. Cai M, Zhou Y, Gesang SL, Bianba C, Ding LS (2006) Chemical fingerprint analysis of rhizomes of *Gymnadenia conopsea* by HPLC-DAD-MS. *J Chromatogr B* 844: 301–307. PMID: [16934540](#)
48. Chen WL, Xu KX, Li Y, Chen Y (2007) Applying the reference-wavelength method to improve the precision of glucose measurement by near infrared spectroscopy. *Chin Opt Lett* 5: 706–708.
49. Dormann CF, McPherson JM, Araújo MB, Bivand R, Bolliger J, Carl G, et al. (2007) Methods to account for spatial autocorrelation in the analysis of species distributional data: a review. *Ecography* 30: 609–628.
50. MacGregor JF, Jaeckle C, Kiparissides C, Koutoudi M (1994) Process monitoring and diagnosis by multiblock PLS methods. *AICHE J* 40: 826–838.
51. Kresta JV, Macgregor JF, Marlin TE (2009) Multivariate statistical monitoring of process operating performance. *Can J Chem Eng* 69: 35–47.
52. Piovoso M, Kosanovich K, Pearson R (1992) Monitoring process performance in real-time, American Control Conference. *IEEE* 2359–2363 p.
53. Wise BM, Gallagher NB (1996) The process chemometrics approach to process monitoring and fault detection. *J Process Contr* 6: 329–348.
54. Wold S, Esbensen K, Geladi P (1987) Principal component analysis. *Chemometr Intell Lab* 2: 37–52.
55. Liu G, Yu J (2007) Gray correlation analysis and prediction models of living refuse generation in Shanghai city. *Waste Manage* 27(3): 345–351. PMID: [16713240](#)
56. Yeh YL, Chen TC (2004) Application of grey correlation analysis for evaluating the artificial lake site in Pingtung Plain, Taiwan. *Can J Civ Eng* 31: 56–64.
57. Garson D. Path analysis. Retrieved June, 29, 2005. Available: [http://www.zozlak.org/Wnioskowanie%20Statystyczne/09\\_ZastosowaniaPrzyklady/Garson\\_2008\\_PathAnalysis.pdf](http://www.zozlak.org/Wnioskowanie%20Statystyczne/09_ZastosowaniaPrzyklady/Garson_2008_PathAnalysis.pdf).
58. Yin DX, Liu W, Zhai NN, Yang GH, Wang XJ, Feng YZ, et al. (2014) Anaerobic digestion of pig and dairy manure under photo-dark fermentation condition. *Bioresource Technol* 166: 373–380. doi: [10.1016/j.biortech.2014.05.037](#) PMID: [24929281](#)
59. Fuglevand G, Jackson JA, Jenkins GI (1996) UV-B, UV-A, and blue light signal transduction pathways interact synergistically to regulate chalcone synthase gene expression in Arabidopsis. *Plant Cell* 8: 2347–2357. PMID: [8989887](#)
60. Wilson KE, Wilson MI, Greenberg BM (1998) Identification of the flavonoid glycosides that accumulate in *Brassica napus* L. cv. Topas specifically in response to ultraviolet B radiation. *Photochem Photobiol* 67: 547–553.
61. Wulff A, Anttonen S, Pellinen R, Savonen EM, Sutinen ML, Heller W, et al. (1999) Birch (*Betula pendula* Roth) responses to high UV-B radiation. *Boreal Environ Res* 4: 77–88. PMID: [10494137](#)
62. Lu SP, Sui XX, Sun Q, Sun BQ (2006) Biological functions of secondary metabolism of medicinal plants and influences of ecological environment. *Nat Prod Res Dev* 18: 1027–1032. (In Chinese with English abstract.).
63. Liu J, Xu XJ (2002) *Meteorology*. Beijing: China Agriculture Press. (In Chinese.).
64. Zhu RB, Wu QS, Wan ZL, Ding YP (2001) Influence of altitudes on effective compositions of American Ginseng in Mountains of West Anhui. *Chin J Agri Meteorol* 22: 19–24. (In Chinese with English abstract.).
65. Zobayed SMA, Afreen F, Kozai T (2005) Temperature stress can alter the photosynthetic efficiency and secondary metabolite concentrations in St. John's wort. *Plant Physiol Biochem* 43: 977–984. PMID: [16310362](#)
66. Wahid A, Ghazanfar A (2006) Possible involvement of some secondary metabolites in salt tolerance of sugarcane. *J Plant Physiol* 163: 723–730. PMID: [16616583](#)
67. Liu TC (1995) *Panax quinquefolium* of China. Beijing: People's Medical Publishing House. (In Chinese.).
